# Supplementary material for: Associations of Childhood Neglect With the ACTH and Plasma Cortisol Stress Response in Patients With Type 2 Diabetes
Source: PubMed Central journal article supplement (PMC8247465; doi:10.3389/fpsyt.2021.679693), 2021-06-17
Supplement: Data_Sheet_1.pdf [file Data_Sheet_1.pdf]

## Supplementary Material

### 1 VAS Items

(Translated from German)

#### 1.1 Tension

The following item was answered before, directly after as well as 45 minutes after the stress test.

*Please indicate how you're feeling currently! You can place your mark on or in between numbers.*

*How tense/relaxed are you feeling in this Moment?*

1.....2.....3.....4.....5.....6.....7.....8.....9.....10  
*completely relaxed* *very tense*

#### 1.2 Appraisal of the TSST

The following items were answered directly after the stress test.

*Please rate the following statements on the past situation (stress test). You can place your mark on or in between numbers.*

*The past situation was stressful for me.*

1.....2.....3.....4.....5.....6.....7.....8.....9.....10  
*Not at all* *very much*

*I experienced the past situation as a threat*

1.....2.....3.....4.....5.....6.....7.....8.....9.....10  
*Not at all* *very much*

*I experienced the past situation as a challenge*

1.....2.....3.....4.....5.....6.....7.....8.....9.....10  
*Not at all* *very much*

## 2 Multilevel Models

The baseline model, predicting participants individual cortisol (or ACTH) levels over time, containing the predictors time, type 2 diabetes and the control variables as well as the respective cross-level interactions with time can be specified in formal terms as follows:

$$\text{Level 1: } Cort_{ji} = b_{0i} + b_{1i} (TIME)_{ji} + e_{ji}$$

$$\text{Level 2: } b_{0i} = b_{00} + b_{01}(TYPE\ 2\ DIABETES)_i + b_{02}(CONTROL)_i + u_{0i}$$

$$\text{Cross-level interaction: } b_{1i} = (b_{10} + b_{11}(TYPE\ 2\ DIABETES)_i + b_{12}(CONTROL)_i)$$

Level 1 represents cortisol levels at individual measurement point  $j$  ( $T_0, T_1, T_2, T_3$ ) for individual  $i$  (within participants model).  $B_{0i}$  signifies the random intercept for participant  $i$ ,  $b_{1i}$  denotes the fixed slope as regression coefficient for the predictor time and  $e_{ji}$  is the random residual term for participant  $i$  at measurement point  $j$ . Level 2 can be understood as the between participants model with  $b_{00}$  denoting the grand mean,  $b_{01}$  and  $b_{02}$  representing the regression coefficients for the predictors type 2 diabetes and the control variables ( $(CONTROL)_i$  stands as “placeholder” for all control variables i.e. age, gender, BMI and lifetime major depression) and  $u_{0i}$  signifying the random component in the intercept.

In the subsequent model we included severity of (physical or emotional) neglect as well as the interaction between severity of neglect and type 2 diabetes and the respective cross-level interactions with time in the same manner:

$$\text{Level 1: } Cort_{ji} = b_{0i} + b_{1i} (TIME)_{ji} + e_{ji}$$

$$\text{Level 2: } b_{0i} = b_{00} + b_{01}(TYPE\ 2\ DIABETES)_i + b_{02}(CONTROL)_i + b_{03}(NEGLECT)_i +$$

$$b_{04}(NEGLECT \times TYPE\ 2\ DIABETES)_i + u_{0i}$$

$$\text{Cross-level interaction: } b_{1i} = (b_{10} + b_{11}(TYPE\ 2\ DIABETES)_i + b_{12}(CONTROL)_i + b_{13}(NEGLECT)_i +$$

$$b_{14}(NEGLECT \times TYPE\ 2\ DIABETES)_i)$$

### 3 SCID Diagnoses

**Table A:** Numbers and percentages of SCID Diagnoses of sections A (affective disorders) and F (anxiety disorders) in type 2 diabetes patients and healthy controls

| SCID Diagnoses                          | Type 2 Diabetes Patients (n=74) | Healthy Controls (n=50) | <i>p</i> |
|-----------------------------------------|---------------------------------|-------------------------|----------|
| Major depression current                | 1                               | 2                       | .350     |
| Major depression lifetime               | 26(35.1%)                       | 11(22.0%)               | .138     |
| Bipolar disorder (I & II)               | 0                               | 0                       |          |
| Bipolar disorder (I & II) lifetime      | 0                               | 0                       |          |
| Dysthymia                               | 5(6.8%)                         | 2(4.0%)                 | .485     |
| Panic disorder current                  | 3(4.1%)                         | 0                       | .144     |
| Panic disorder lifetime                 | 7(9.5%)                         | 2(4.0%)                 | .219     |
| Agoraphobia current                     | 5(6.8%)                         | 0                       | .061     |
| Agoraphobia lifetime                    | 4(5.4%)                         | 0                       | .092     |
| Social phobia current                   | 1(1.4%)                         | 0                       | .409     |
| Social phobia lifetime                  | 2(2.7%)                         | 1(2.0%)                 | .794     |
| Specific phobia current                 | 5(6.8%)                         | 0                       | .061     |
| Specific phobia lifetime                | 5(6.8%)                         | 0                       | .059     |
| Obsessive-compulsive disorder current   | 0                               | 0                       |          |
| Obsessive-compulsive disorder lifetime  | 0                               | 0                       |          |
| Post-traumatic stress disorder current  | 0                               | 1                       | .211     |
| Post-traumatic stress disorder lifetime | 1                               | 1                       | .798     |
| Generalized anxiety disorder            | 0                               | 0                       |          |

**Note:** Diagnoses of panic disorder as depicted here include diagnoses of panic disorder with and without agoraphobia; diagnoses of agoraphobia as depicted here include diagnoses of agoraphobia without panic disorder. P-Values are derived using  $\chi^2$ -test.

## 4 CTQ Scores

**Table B:** CTQ severity scores depicted as mean values with standard deviations and prevalence of moderate to severe abuse or neglect depicted as number with percentages.

| CTQ Severity Scores (5-25)                        | Type 2 Diabetes Patients (n=74) | Healthy Controls (n=50) | <i>p</i> |
|---------------------------------------------------|---------------------------------|-------------------------|----------|
| Emotional neglect                                 | 11.6(5.9)                       | 10.1(4.0)               | .090     |
| Physical neglect                                  | 7.8(2.6)                        | 7.5(2.2)                | .509     |
| Emotional abuse                                   | 7.2(3.1)                        | 7.3(3.0)                | .827     |
| Physical abuse                                    | 6.4(3.2)                        | 6.1(2.2)                | .637     |
| Sexual abuse                                      | 6.5(4.0%)                       | 6.2(3.1%)               | .640     |
| Prevalence of moderate to severe abuse or neglect |                                 |                         |          |
| Emotional neglect                                 | 18(24.3%)                       | 7(14.0%)                | .119     |
| Physical neglect                                  | 18(24.3%)                       | 12(24.0)                | .571     |
| Emotional abuse                                   | 4(5.4%)                         | 2(4.0%)                 | .538     |
| Physical abuse                                    | 9(12.4%)                        | 3(6.0)                  | .206     |
| Sexual abuse                                      | 12(16.2%)                       | 7(14.0%)                | .491     |

**Note:** *P*-values are derived using *t*-test for continuous severity scores and *chi*<sup>2</sup>-test for categorical prevalence scores. Cut-off scores for “moderate to severe” abuse or neglect vary for each scale and are based on Häuser et al. (30).

## 5 Descriptive Statistics for Figure 1-3

**Table C:** Means and standard errors for type 2 diabetes patients and healthy controls with and without the experience of “moderate to severe” childhood **physical** neglect.

|                         | Type 2 Diabetes Patients (n=74) |                       | Healthy Controls (n=50) |                       |
|-------------------------|---------------------------------|-----------------------|-------------------------|-----------------------|
|                         | Low physical neglect            | High physical neglect | Low physical neglect    | High physical neglect |
| VAS <sub>Baseline</sub> | 3.8(0.3)                        | 2.9(0.3)              | 3.6(0.3)                | 3.0(0.5)              |
| VAS <sub>+0 min</sub>   | 5.0(0.3)                        | 7.0(0.4)              | 5.3(0.3)                | 4.6(0.6)              |
| VAS <sub>+45 min</sub>  | 3.5(0.3)                        | 5.2(0.6)              | 3.3(0.3)                | 3.5(0.5)              |
| ACTH T <sub>0</sub>     | 16.1(1.1)                       | 17.2(2.1)             | 15.4(1.3)               | 18.3(3.8)             |
| ACTH T <sub>1</sub>     | 27.3(2.1)                       | 33.6(5.1)             | 27.3(2.9)               | 37.9(9.0)             |
| ACTH T <sub>4</sub>     | 18.0(1.2)                       | 20.9(2.7)             | 16.4(1.1)               | 21.8(4.2)             |
| ACTH T <sub>3</sub>     | 16.4(1.6)                       | 15.3(2.4)             | 13.1(0.9)               | 17.0(3.0)             |
| Cortisol T <sub>0</sub> | 117.4(6.2)                      | 115.7(12.7)           | 113.3(7.5)              | 134.0(8.2)            |
| Cortisol T <sub>1</sub> | 167.8(7.5)                      | 188.9(11.6)           | 152.4(9.9)              | 170.2(12.6)           |
| Cortisol T <sub>2</sub> | 150.6(8.9)                      | 153.5(14.5)           | 131.9(8.9)              | 159.4(12.6)           |
| Cortisol T <sub>3</sub> | 120.8(6.7)                      | 121.4(10.2)           | 108.5(8.1)              | 134.8(9.9)            |

VAS= visual analogue scale assessing feelings of tension

**Table D:** Means and standard errors for type 2 diabetes patients and healthy controls with and without the experience of “moderate to severe” childhood **emotional** neglect.

|                         | Type 2 Diabetes Patients (n=74) |                        | Healthy Controls (n=50) |                        |
|-------------------------|---------------------------------|------------------------|-------------------------|------------------------|
|                         | Low emotional neglect           | High emotional neglect | Low emotional neglect   | High emotional neglect |
| VAS <sub>Baseline</sub> | 3.8(0.3)                        | 2.9(0.3)               | 3.5(0.3)                | 2.9(0.7)               |
| VAS <sub>+0 min</sub>   | 5.1(0.3)                        | 6.7(0.5)               | 5.2(0.3)                | 4.3(0.7)               |
| VAS <sub>+45 min</sub>  | 3.7(0.3)                        | 4.7(0.6)               | 3.2(0.2)                | 4.1(1.0)               |
| ACTH T <sub>0</sub>     | 15.4(1.0)                       | 19.5(2.3)              | 16.7(1.4)               | 12.8(2.5)              |
| ACTH T <sub>1</sub>     | 27.5(2.1)                       | 33.5(5.5)              | 31.7(3.4)               | 19.2(4.3)              |
| ACTH T <sub>4</sub>     | 17.7(1.1)                       | 22.3(3.1)              | 18.2(1.5)               | 14.6(2.4)              |
| ACTH T <sub>3</sub>     | 14.7(1.4)                       | 20.1(3.0)              | 14.3(1.1)               | 12.2(1.5)              |
| Cortisol T <sub>0</sub> | 116.0(6.3)                      | 120.1(12.3)            | 119.4(7.1)              | 108.8(11.8)            |
| Cortisol T <sub>1</sub> | 170.2(7.2)                      | 182.7(13.5)            | 161.7(8.9)              | 128.9(19.6)            |
| Cortisol T <sub>2</sub> | 152.5(9.0)                      | 147.4(13.4)            | 140.8(8.1)              | 124.2(23.1)            |
| Cortisol T <sub>3</sub> | 118.2(6.5)                      | 129.5(11.1)            | 113.8(7.7)              | 115.6(16.0)            |

VAS= visual analogue scale assessing feelings of tension
